# Supplementary material
Source: PubMed Central journal article supplement (PMC2174174)

**E07-05-0505 Lederkremer**

**Supplemental figure 1.** Anti-ERManI recognizes specifically exogenously expressed ERManI, which can be knocked-down by anti-ERManI shRNA.

HEK 293 cells were transfected with pMH plasmid containing ERManI-HA cDNA (lanes 1, 2) or with empty pMH (lane 3) together with pSUPER plasmid encoding anti-lacZ shRNA (lane 1) or encoding anti-ERManI shRNA (lane 2). Two days posttransfection the cells were pulse-labeled with [<sup>35</sup>S]Cys for 20 min and lysed. ERManI was immunoprecipitated with anti-ERManI antibody and the immunoprecipitates were separated in 10% SDS-PAGE followed by fluorography.

**Supplemental figure 2.** Similar juxtannuclear pattern of ERManI over a wide expression range.

NIH 3T3 cells transiently expressing ERManI-HA cDNA were fixed and subjected to immunofluorescent staining with rabbit anti-ERManI antibodies and Cy2-conjugated goat anti-rabbit IgG. Confocal imaging and quantification of the intensity of the ERManI signal in each cell was done as described in Materials and Methods. Shown next to each cell is the intensity of the ERManI signal per voxel multiplied by the total number of voxels occupied (in arbitrary units). Note that the ERQC staining (ERManI signal) appears in a juxtannuclear pattern with varying extension, similar to Golgi staining.

Avezov et al - suppl Fig. 1

Transfection:

|                   |   |   |   |
|-------------------|---|---|---|
| ERManI cDNA       | + | + | - |
| control shRNA     | + | - | - |
| anti-ERManI shRNA | - | + | - |

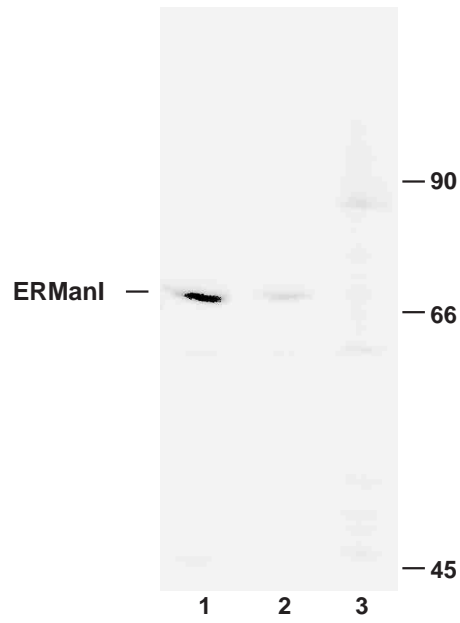

Avezov et al - suppl Fig. 2

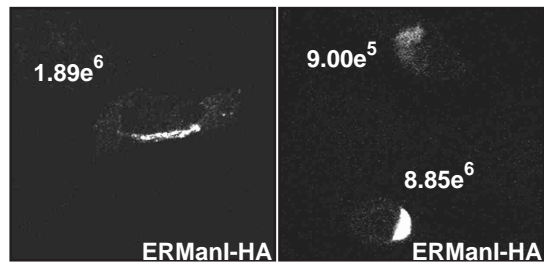

Supplement: mbc_E07-05-0505_1.pdf [file mbc_E07-05-0505_1.pdf]
